# Supplementary material for: Maternal obesity during lactation may protect offspring from high fat diet-induced metabolic dysfunction
Source: Nutr Diabetes. 2018 Apr 25;8:18. doi: 10.1038/s41387-018-0027-z (PMC5916951; doi:10.1038/s41387-018-0027-z)
Supplement: Supplementary file 5 — Figure S4(PDF 91 kb) [file 41387_2018_27_MOESM5_ESM.pdf]

01/31/2017 Re-Scoring of: 04/05/2015 Brunt Scoring of Monks 20 wk LN OP OR foster pup expt

H&E for most criteria  
PSR for Fibrosis  
PAS for foamy macs

Group --->  
animal# --->  
animal sub # --->

| Feature                              |                                  | Points | LN:LN                                |     |     |     |     |     |     |     |     |     |     |     |     |      |      |       | LN:LN |         |    |     | LN:OP                            |     |     |     |     |
|--------------------------------------|----------------------------------|--------|--------------------------------------|-----|-----|-----|-----|-----|-----|-----|-----|-----|-----|-----|-----|------|------|-------|-------|---------|----|-----|----------------------------------|-----|-----|-----|-----|
|                                      |                                  |        | 367                                  | 367 | 367 | 367 | 367 | 367 | 367 | 367 | 367 | 368 | 368 | 368 | 368 | 368  | 368  | 368   | ave   | std dev | N  | sem | 360                              | 360 | 360 | 360 | 361 |
|                                      |                                  |        | LA                                   | LB  | LC  | LF  | LG  | LH  | RLA | RLB | A   | B   | C   | RA  | RC  |      |      |       |       |         |    | LA  | LB                               | LC  | LD  | RA  |     |
| <b>Liver cell injury</b>             |                                  |        |                                      |     |     |     |     |     |     |     |     |     |     |     |     |      |      |       |       |         |    |     |                                  |     |     |     |     |
| ballooning                           | none                             | 0      | 0                                    | 0   | 0   | 0   | 0   | 0   | 0   | 0   | 0   | 0   | 0   | 0   | 0   | 0    | 0    |       |       |         |    | 0   | 0                                | 0   | 0   | 0   |     |
|                                      | few                              | 2      |                                      |     |     |     |     |     |     |     |     |     |     |     |     |      |      |       |       |         |    |     |                                  |     |     |     |     |
|                                      | many                             | 4      |                                      |     |     |     |     |     |     |     |     |     |     |     |     |      |      |       |       |         |    |     |                                  |     |     |     |     |
| acidophil bodies                     | none                             | 0      | 0                                    | 0   | 0   | 0   | 0   | 0   | 0   | 0   | 0   | 0   | 0   | 0   | 0   | 0    | 0    |       |       |         |    | 0   | 0                                | 0   | 0   | 0   |     |
|                                      | few                              | 2      |                                      |     |     |     |     |     |     |     |     |     |     |     |     |      |      |       |       |         |    |     |                                  |     |     |     |     |
|                                      | many (≥1 per 200x field)         | 4      |                                      |     |     |     |     |     |     |     |     |     |     |     |     |      |      |       |       |         |    |     |                                  |     |     |     |     |
| Necrotic cells                       | none                             | 0      | 0                                    | 0   | 0   | 0   | 0   | 0   | 0   | 0   | 0   | 0   | 0   | 0   | 0   | 0    | 0    |       |       |         |    | 0   | 0                                | 0   | 0   | 0   |     |
|                                      | present (≥2/200x field)          | 2      |                                      |     |     |     |     |     |     |     |     |     |     |     |     |      |      |       |       |         |    |     |                                  |     |     |     |     |
| pigmented macrophages                | none                             | 0      | 0                                    | 0   | 0   | 0   | 0   | 0   | 0   | 0   | 0   | 0   | 0   | 0   | 0   | 0    | 0    |       |       |         |    | 0   | 0                                | 0   | 0   | 0   |     |
|                                      | many                             | 1      |                                      |     |     |     |     |     |     |     |     |     |     |     |     |      |      |       |       |         |    |     |                                  |     |     |     |     |
| megamitochondria                     | none                             | 0      | 0                                    | 0   | 0   | 0   | 0   | 0   | 0   | 0   | 0   | 0   | 0   | 0   | 0   | 0    | 0    |       |       |         |    | 0   | 0                                | 0   | 0   | 0   |     |
|                                      | present                          | 1      |                                      |     |     |     |     |     |     |     |     |     |     |     |     |      |      |       |       |         |    |     |                                  |     |     |     |     |
| sinusoidal dilatation & congest      | none                             | 0      | 0                                    | 0   | 0   | 0   | 0   | 0   | 0   | 0   | 0   | 0   | 0   | 0   | 0   | 0    | 0    |       |       |         |    | 0   | 0                                | 0   | 0   | 0   |     |
|                                      | Yes (≥3 RBC diam)                | 1      |                                      |     |     |     |     |     |     |     |     |     |     |     |     |      |      |       |       |         |    |     |                                  |     |     |     |     |
| True abscesses (>6 cell diams)       | no                               | 0      | 0                                    | 0   | 0   | 0   | 0   | 0   | 0   | 0   | 0   | 0   | 0   | 0   | 0   | 0    | 0    |       |       |         |    | 0   | 0                                | 0   | 0   | 0   |     |
|                                      | Yes (>1 / 40x field)             | 2      |                                      |     |     |     |     |     |     |     |     |     |     |     |     |      |      |       |       |         |    |     |                                  |     |     |     |     |
| <b>Injury Subtotal</b>               |                                  |        | 0                                    | 0   | 0   | 0   | 0   | 0   | 0   | 0   | 0   | 0   | 0   | 0   | 0   | 0    | 0    | 0     | 0     | 0       | 13 | 0   | 0                                | 0   | 0   | 0   |     |
| <b>Inflammation</b>                  |                                  |        |                                      |     |     |     |     |     |     |     |     |     |     |     |     |      |      |       |       |         |    |     |                                  |     |     |     |     |
| lobular inflammation                 | <2 per 200x field                | 0      | 0                                    | 0   | 0   |     | 0   |     |     |     | 0   |     | 0   |     | 0   |      |      |       |       |         |    |     | 0                                | 0   | 0   | 0   | 0   |
|                                      | 2 per 200x field                 | 1      |                                      |     |     |     |     |     |     | 1   |     | 1   |     |     | 1   |      |      |       |       |         |    |     |                                  |     |     |     |     |
|                                      | 2-4 per 200x field               | 2      |                                      |     |     | 2   |     | 2   | 2   |     |     |     |     |     |     |      |      |       |       |         |    |     |                                  |     |     |     |     |
|                                      | >4 per 200x field                | 3      |                                      |     |     |     |     |     |     |     |     |     |     |     |     |      |      |       |       |         |    |     |                                  |     |     |     |     |
| foci of inflammatory cells           | absent ( < 1 / 200x field)       | 0      | 0                                    |     | 0   |     | 0   |     |     |     | 0   |     | 0   |     |     |      |      |       |       |         |    | 0   | 0                                |     | 0   |     |     |
|                                      | present (1 or more / 200x field) | 1      |                                      | 1   |     | 1   |     | 1   | 1   | 1   |     | 1   |     | 1   | 1   |      |      |       |       |         |    |     |                                  | 1   |     | 1   |     |
| lipogranulomas                       | absent                           | 0      | 0                                    |     | 0   |     | 0   |     |     |     | 0   | 0   |     |     |     |      |      |       |       |         |    | 0   | 0                                | 0   | 0   |     |     |
|                                      | present                          | 2      |                                      | 1   |     | 1   |     | 1   | 1   | 1   |     |     |     | 1   | 1   |      |      |       |       |         |    |     |                                  |     |     | 1   |     |
| portal inflammation                  | none to minimal                  | 0      | 0                                    | 0   | 0   | 0   | 0   | 0   | 0   | 0   | 0   | 0   | 0   | 0   | 0   | 0    | 0    |       |       |         |    | 0   | 0                                | 0   | 0   | 0   |     |
|                                      | more than minimal                | 1      |                                      |     |     |     |     |     |     |     |     |     |     |     |     |      |      |       |       |         |    |     |                                  |     |     |     |     |
| Ceroid laden Kupffer c               | No                               | 0      | 0                                    |     | 0   |     | 0   |     |     |     | 0   |     | 0   |     | 0   |      |      |       |       |         |    |     | 0                                |     | 0   | 0   |     |
|                                      | Yes (≥3 / 200x field)            | 1      |                                      | 1   |     | 1   |     | 1   | 1   | 1   |     | 1   |     | 1   |     |      |      |       |       |         |    | 1   |                                  | 1   |     |     |     |
| Langhans giant cells                 | No                               | 0      | 0                                    | 0   | 0   | 0   | 0   | 0   | 0   | 0   | 0   | 0   | 0   | 0   | 0   | 0    | 0    |       |       |         |    | 0   | 0                                | 0   | 0   | 0   |     |
|                                      | Yes (≥1 / 200x field)            | 1      |                                      |     |     |     |     |     |     |     |     |     |     |     |     |      |      |       |       |         |    |     |                                  |     |     |     |     |
| Foamy macrophages                    | No                               | 0      | 0                                    | 0   | 0   | 0   | 0   | 0   | 0   | 0   | 0   | 0   | 0   | 0   | 0   | 0    | 0    |       |       |         |    | 0   | 0                                | 0   | 0   | 0   |     |
|                                      | Yes                              | 1      |                                      |     |     |     |     |     |     |     |     |     |     |     |     |      |      |       |       |         |    |     |                                  |     |     |     |     |
| <b>Inflam Subtotal</b>               |                                  |        | 0                                    | 3   | 0   | 5   | 0   | 5   | 5   | 4   | 0   | 3   | 0   | 4   | 2   | 2    | 2    | 2     | 13    | 1       |    | 1   | 0                                | 2   | 0   | 2   |     |
| <b>Reactive Chnages</b>              |                                  |        |                                      |     |     |     |     |     |     |     |     |     |     |     |     |      |      |       |       |         |    |     |                                  |     |     |     |     |
| Mallory's hyaline                    | none                             | 0      | 0                                    | 0   | 0   | 0   | 0   | 0   | 0   | 0   | 0   | 0   | 0   | 0   | 0   | 0    | 0    |       |       |         |    | 0   | 0                                | 0   | 0   | 0   |     |
|                                      | many                             | 1      |                                      |     |     |     |     |     |     |     |     |     |     |     |     |      |      |       |       |         |    |     |                                  |     |     |     |     |
| Glycogenated nuclei                  | none ( < 1 / 200x field)         | 0      | 0                                    | 0   | 0   | 0   | 0   | 0   | 0   | 0   | 0   | 0   | 0   | 0   | 0   | 0    | 0    |       |       |         |    | 0   | 0                                | 0   | 0   | 0   |     |
|                                      | few (1-3 per 200x field)         | 1      |                                      |     |     |     |     |     |     |     |     |     |     |     |     |      |      |       |       |         |    |     |                                  |     |     |     |     |
|                                      | many ( > 3 /200x field)          | 2      |                                      |     |     |     |     |     |     |     |     |     |     |     |     |      |      |       |       |         |    |     |                                  |     |     |     |     |
| ductal reaction                      | none                             | 0      | 0                                    | 0   |     | 0   | 0   | 0   | 0   | 0   | 0   | 0   |     |     | 0   |      |      |       |       |         |    | 0   | 0                                | 0   | 0   | 0   |     |
|                                      | minor                            | 1      |                                      |     |     | 1   |     |     |     |     |     |     |     | 1   |     |      |      |       |       |         |    |     |                                  |     |     |     |     |
|                                      | robust                           | 2      |                                      |     |     |     |     |     |     |     |     |     |     |     |     |      |      |       |       |         |    |     |                                  |     |     |     |     |
| mitotic figures                      | <2 per 200x field                | 0      | 0                                    | 0   | 0   | 0   | 0   | 0   | 0   | 0   | 0   | 0   | 0   | 0   | 0   | 0    | 0    |       |       |         |    | 0   | 0                                | 0   | 0   | 0   |     |
|                                      | >2 per 200x field                | 0      |                                      |     |     |     |     |     |     |     |     |     |     |     |     |      |      |       |       |         |    |     |                                  |     |     |     |     |
| hyperpl nod regen morph              | no                               | 0      | 0                                    | 0   | 0   | 0   | 0   | 0   | 0   | 0   | 0   | 0   | 0   | 0   | 0   | 0    | 0    |       |       |         |    | 0   | 0                                | 0   | 0   | 0   |     |
|                                      | yes                              | 1      |                                      |     |     |     |     |     |     |     |     |     |     |     |     |      |      |       |       |         |    |     |                                  |     |     |     |     |
| hyalinized & thickened PV&HA         | none                             | 0      | 0                                    | 0   | 0   | 0   | 0   | 0   | 0   | 0   | 0   | 0   | 0   | 0   | 0   | 0    | 0    |       |       |         |    | 0   | 0                                | 0   | 0   | 0   |     |
|                                      | present                          | 1      |                                      |     |     |     |     |     |     |     |     |     |     |     |     |      |      |       |       |         |    |     |                                  |     |     |     |     |
| Giant Cell Transformation            | No                               | 0      | 0                                    | 0   | 0   | 0   | 0   | 0   | 0   | 0   | 0   | 0   | 0   | 0   | 0   | 0    | 0    |       |       |         |    | 0   | 0                                | 0   | 0   | 0   |     |
|                                      | Yes                              | 1      |                                      |     |     |     |     |     |     |     |     |     |     |     |     |      |      |       |       |         |    |     |                                  |     |     |     |     |
| <b>Reactive Subtotal</b>             |                                  |        | 0                                    | 0   | 0   | 1   | 0   | 0   | 0   | 0   | 0   | 0   | 0   | 1   | 0   | 0    | 0    | 0     | 13    | 0       |    | 0   | 0                                | 0   | 0   | 0   |     |
| <b>Steatosis</b>                     |                                  |        |                                      |     |     |     |     |     |     |     |     |     |     |     |     |      |      |       |       |         |    |     |                                  |     |     |     |     |
| Macrovesicular steatosis             | <10%                             | 0      | 0                                    |     | 0   |     | 0   |     |     | 0   | 0   | 0   |     |     |     |      |      |       |       |         |    | 0   | 0                                | 0   |     |     |     |
|                                      | 10-33%                           | 1      |                                      | 1   |     | 1   |     | 1   | 1   | 1   |     |     |     | 1   | 1   |      |      |       |       |         |    |     |                                  |     | 1   | 1   |     |
|                                      | 33-66%                           | 2      |                                      |     |     |     |     |     |     |     |     |     |     |     |     |      |      |       |       |         |    |     |                                  |     |     |     |     |
|                                      | >66%                             | 3      |                                      |     |     |     |     |     |     |     |     |     |     |     |     |      |      |       |       |         |    |     |                                  |     |     |     |     |
| Microvesicular steatosis             | not present                      | 0      |                                      |     |     |     | 0   |     |     |     | 0   |     | 0   |     |     |      |      |       |       |         |    |     |                                  |     |     |     |     |
|                                      | (filled with CLDs, central nuc   | 1      | 1                                    | 1   | 1   | 1   |     | 1   | 1   | 1   |     | 1   |     | 1   | 1   |      |      |       |       |         |    | 1   | 1                                | 1   | 1   | 1   |     |
|                                      | present (>5% of hepatos)         | 1      | 1                                    | 2   | 1   | 2   | 0   | 2   | 2   | 2   | 0   | 1   | 0   | 2   | 2   | 1    | 1    | 1     | 13    | 0       |    | 1   | 1                                | 1   | 2   | 2   |     |
| <b>Steatosis Subtotal</b>            |                                  |        | 1                                    | 2   | 1   | 2   | 0   | 2   | 2   | 2   | 0   | 1   | 0   | 2   | 2   | 1    | 1    | 1     | 13    | 0       |    | 1   | 1                                | 1   | 2   | 2   |     |
| <b>Fibrosis</b>                      |                                  |        |                                      |     |     |     |     |     |     |     |     |     |     |     |     |      |      |       |       |         |    |     |                                  |     |     |     |     |
| now assessed by quantitative PSR stn |                                  |        | now assessed by quantitative PSR stn |     |     |     |     |     |     |     |     |     |     |     |     |      |      |       |       |         |    |     | now assessed by quantitative PSR |     |     |     |     |
| (see separate graphed result)        |                                  |        |                                      |     |     |     |     |     |     |     |     |     |     |     |     |      |      |       |       |         |    |     |                                  |     |     |     |     |
| <b>Summary</b>                       |                                  |        |                                      |     |     |     |     |     |     |     |     |     |     |     |     |      |      |       |       |         |    |     |                                  |     |     |     |     |
|                                      |                                  |        | LN:LN                                |     |     |     |     |     |     |     |     |     |     |     |     |      |      |       | LN:LN |         |    |     | LN:OP                            |     |     |     |     |
|                                      |                                  |        | 367                                  | 367 | 367 | 367 | 367 | 367 | 367 | 367 | 368 | 368 | 368 | 368 | 368 | 368  | 368  | 368   |       |         |    |     | 360                              | 360 | 360 | 360 | 361 |
|                                      |                                  |        | LA                                   | LB  | LC  | LF  | LG  | LH  | RLA | RLB | A   | B   | C   | RA  | RC  |      |      |       |       |         |    | LA  | LB                               | LC  | LD  | RA  |     |
| <b>Scoring by Category</b>           |                                  |        | 0                                    | 0   | 0   | 0   | 0   | 0   | 0   | 0   | 0   | 0   | 0   | 0   | 0   | 0.00 | 0.00 | 13.00 | 0.00  |         |    | 0   | 0                                | 0   | 0   | 0   |     |
| <b>Cell Injury</b>                   |                                  |        | 0                                    | 3   | 0   | 5   | 0   | 5   | 5   |     |     |     |     |     |     |      |      |       |       |         |    |     |                                  |     |     |     |     |

**l stn** now assessed by quantitative PSR stn
